# Supplementary material for: The malaria burden of Amerindian groups of three Venezuelan states: A descriptive study based on programmatic data
Source: Research Square preprint supplement (doi:10.21203/rs.3.rs-288810/v1), 2021-03-10
Supplement: Supplementary file 1 [file 1f5f4743f12ca271caec389d.xlsx]

## Sheet: Sheet1
Additional file 4: Estimated indigenous population and growth rates
Municipality	Ind. 2011	Gen 2011	Gen 2018	Rg-11-18	2014 (1+Rg)^3	2015 (1+Rg)^4	2016 (1+Rg)^5	2017 (1+Rg)^6	2018 (1+Rg)^7	Exp 2014	Exp 2015	Exp 2016	Exp 2017	Exp 2018
Indigenous
Amazonas state	76314	158999	192835	0.0275624	1.08499	1.11489	1.14562	1.1772	1.20964	82800	85082	87427	89837	92313
Alto Orinoco	12410	13115	15395	0.022898	1.07028	1.09479	1.11985	1.1455	1.17173	13282	13586	13897	14216	14541
Atabapo	8624	9584	11386	0.0246128	1.07567	1.10215	1.12927	1.15707	1.18555	9277	9505	9739	9979	10224
Atures	36004	114606	140308	0.0289057	1.08925	1.12073	1.15313	1.18646	1.22076	39217	40351	41517	42717	43952
Autana	7912	9051	10813	0.0254106	1.07819	1.10558	1.13368	1.16248	1.19202	8531	8747	8970	9198	9431
Manapiare	7373	8157	9606	0.0233588	1.07173	1.09676	1.12238	1.1486	1.17543	7902	8086	8275	8469	8666
Maroa	1882	2104	2516	0.0255471	1.07862	1.10617	1.13443	1.16341	1.19313	2030	2082	2135	2190	2245
Río Negro	2109	2382	2811	0.0236571	1.07266	1.09804	1.12402	1.15061	1.17783	2262	2316	2371	2427	2484
Bolívar state	54686	1636140	1837485	0.0165797	1.05057	1.06799	1.08569	1.10369	1.12199	57451	58404	59372	60357	61357
Caroní	1456	818027	921389	0.0169981	1.05187	1.06975	1.08793	1.10642	1.12523	1532	1558	1584	1611	1638
Cedeño	10726	93998	104823	0.0155714	1.04745	1.06376	1.08032	1.09714	1.11423	11235	11410	11588	11768	11951
El Callao	31	23353	26109	0.0159364	1.04858	1.06529	1.08226	1.09951	1.11703	33	33	34	34	35
Gran Sabana	16038	34905	39109	0.0162461	1.04953	1.06659	1.08391	1.10152	1.11942	16832	17106	17384	17666	17953
Heres	3687	380299	427399	0.01668	1.05088	1.06841	1.08623	1.10435	1.12277	3875	3939	4005	4072	4140
Piar	706	114605	128320	0.016148	1.04923	1.06617	1.08339	1.10088	1.11866	741	753	765	777	790
Bolivariano Angostura	7375	48362	53686	0.0149197	1.04543	1.06103	1.07686	1.09292	1.10923	7710	7825	7942	8060	8181
Roscio	10	25022	28087	0.0165073	1.05034	1.06768	1.08531	1.10322	1.12143	11	11	11	11	11
Sifontes	8746	58068	64626	0.015286	1.04656	1.06256	1.0788	1.09529	1.11204	9153	9293	9435	9579	9726
Sucre	5868	22494	25035	0.0152895	1.04657	1.06257	1.07882	1.09532	1.11206	6141	6235	6331	6427	6526
Padre Pedro Chien	43	17007	18902	0.0150918	1.04596	1.06175	1.07777	1.09404	1.11055	45	46	46	47	48
Sucre state	22213	965451	1075445	0.0154135	1.04696	1.06309	1.07948	1.09612	1.11301	23256	23615	23978	24348	24723
Andrés Eloy Blanco	173	27934	30914	0.0144807	1.04407	1.05919	1.07453	1.09009	1.10588	181	183	186	189	191
Andrés Mata	26	20731	23121	0.0155873	1.04749	1.06382	1.0804	1.09724	1.11435	27	28	28	29	29
Arismendi	7	49676	55177	0.0150035	1.04569	1.06138	1.0773	1.09347	1.10987	7	7	8	8	8
Benítez	594	33185	36578	0.013907	1.0423	1.0568	1.0715	1.0864	1.10151	619	628	636	645	654
Bermúdez	177	147848	162908	0.0138573	1.04215	1.05659	1.07123	1.08608	1.10113	184	187	190	192	195
Bolívar	2	23057	25742	0.0157364	1.04796	1.06445	1.0812	1.09821	1.11549	2	2	2	2	2
Cajigal	9	22138	24726	0.0157942	1.04814	1.06469	1.08151	1.09859	1.11594	9	10	10	10	10
Cruz Salmerón Acosta	4	37482	41304	0.0138712	1.04219	1.05665	1.07131	1.08617	1.10123	4	4	4	4	4
Libertador	6	10081	11210	0.0151648	1.04619	1.06205	1.07816	1.09451	1.11111	6	6	6	7	7
Mariño	8	25351	28180	0.0151135	1.04603	1.06184	1.07789	1.09418	1.11071	8	8	9	9	9
Mejía	2	14800	16467	0.0152473	1.04644	1.0624	1.0786	1.09504	1.11174	2	2	2	2	2
Montes	9	56294	62524	0.0149946	1.04566	1.06134	1.07726	1.09341	1.1098	9	10	10	10	10
Ribero	5240	64400	71080	0.0140989	1.0429	1.0576	1.07251	1.08763	1.10297	5465	5542	5620	5699	5780
Sucre	15927	389555	437530	0.0165915	1.0506	1.06804	1.08576	1.10377	1.12208	16733	17011	17293	17580	17871
Valdez	29	42919	47984	0.0159361	1.04857	1.06528	1.08226	1.09951	1.11703	30	31	31	32	32
Ind 2011: Indigenous population according to the 2011 National Census. Gen 2011: General population according to the 2011 National Census. Gen 2018: Projected general population for 2018 according to the National Institute of Statistics. (Rg): Rate of growth (1+Rg): Estimated growth. Exp: Expected indigenous population
